# Supplementary material for: Enhanced Activity by NKCC1 and Slc26a6 Mediates Acidic pH and Cl− Movement after Cardioplegia-Induced Arrest of db/db Diabetic Heart
Source: Hindawi journal article supplement (doi:10.1155/2019/7583760), 2019-09-08
Supplement: f1 [file 7583760.f1.pdf]

# Supplementary Figure

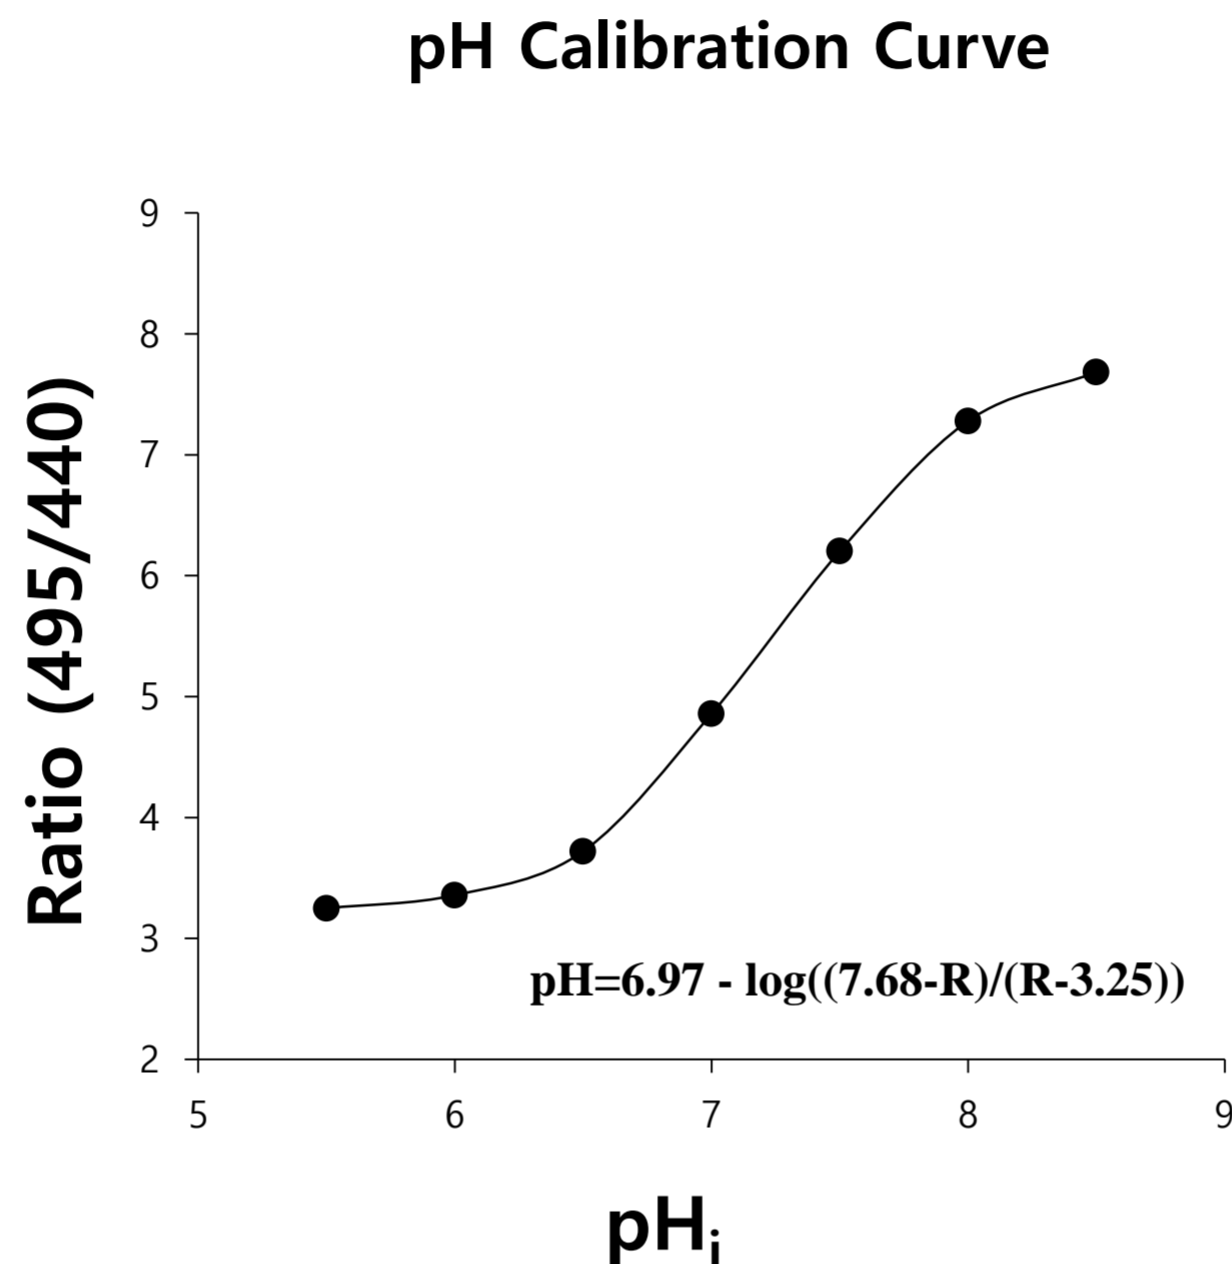

**Supplementary Figure 1.** pH calibration curve for LV cardiac strips at pH 5.5, 6.0, 6.5, 7.0, 7.5, 8.0, and 8.5. Ratios of BCECF-AM (Teflabs) were converted to pH unit as described previously (Nehrke, 2006; Rochon et al., 2007). Briefly, cardiac strips were incubated in the calibration solution (pH 5.5, 6.0, 6.5, 7.0, 7.5, 8.0, and 8.5) for 5 min at room temperature. The equation of pH calibration curve was  $\text{pH} = \text{pKa} + \log\left(\frac{R_{\text{max}} - R}{R - R_{\text{min}}}\right)$  (R: ratio value of BCECF,  $R_{\text{max}}$ : maximum ratio,  $R_{\text{min}}$ : minimum ratio, pKa value of BCECF: 6.97). The BCECF fluorescence ratio was converted to the changes in pH<sub>i</sub> ( $\Delta\text{pH}_i$ ) value, followed by the calibration curve.

\* All supplementary data and figure used to support the findings of this study are included within the article
